# Supplementary material
Source: PubMed Central journal article supplement (PMC10197159)
Supplement: NIHMS1873676-supplement-Supplementary_Material.pdf [file NIHMS1873676-supplement-Supplementary_Material.pdf]

## Supplementary Information for

Mechanical checkpoint regulates monocyte differentiation in fibrotic niches

**Authors:** Kyle H. Vining<sup>1,2,3</sup>, Anna E. Marneth<sup>4</sup>, Kwasi Adu-Berchie<sup>1,2</sup>, Joshua M. Grolman<sup>1,2,†</sup>,  
Christina M. Tringides<sup>5,6</sup>, Yutong Liu<sup>1,2</sup>, Waihay J. Wong<sup>3,7</sup>, Olga Pozdnyakova<sup>7,††</sup>, Mariano  
Severgnini<sup>8</sup>, Alexander Stafford<sup>2</sup>, Georg N. Duda<sup>2,9,10</sup>, F. Stephen Hodi<sup>3</sup>, Ann Mullally<sup>4,3</sup>, Kai  
W. Wucherpennig<sup>11\*</sup>, David J. Mooney<sup>1,2\*</sup>

Underline indicates authors contributed equally

\*Correspondence to: [kai\\_wucherpennig@dfci.harvard.edu](mailto:kai_wucherpennig@dfci.harvard.edu) and [mooneyd@seas.harvard.edu](mailto:mooneyd@seas.harvard.edu)

### **This PDF file includes:**

- Supplementary Methods
- Supplementary Figures 1 to 8
- Supplementary Tables 1 to 9
- Supplementary References

## Supplemental Methods

### Bulk RNA-seq analysis for human samples in Figure S4

Gene counts from bulk human RNA sequencing were Rlog transformed <sup>1</sup>. For differential expression analysis, classic tools such as DESeq2 could not be used because each condition had a single replicate. Instead, variance in expression levels across experimental conditions for each gene was determined. Genes with variances  $\geq 0.3$  were selected as significant for further studies. Heatmap for expression levels of selected genes was then plotted using pheatmap with hierarchical clustering in R <sup>2</sup>. Genes of interest were then put into the ENCODE ChIP-Seq database using ChEA3 <sup>3</sup> to identify transcriptional regulators.

### Fabrication of macroporous collagen-alginate scaffolds

Mixtures of alginate, collagen, and calcium carbonate were obtained as described in the main text methods, and then cast onto 20 mm diameter microwells of a 6-well MatTek plate. The mixture was allowed to ionically crosslink for 45 min before gels were frozen at  $-80\text{ }^{\circ}\text{C}$  and lyophilized to create a porous structure, as previously described <sup>4</sup>. Primary bone marrow human monocytes ( $\sim 1 \times 10^6$  cells) in HBSS, 20 mM HEPES, pH 7.4 were then seeded onto the porous scaffolds in 100  $\mu\text{L}$  and incubated for 60 min before adding full culture media. Cells were retrieved for analysis as described in main text methods.

BM-derived antigen-presenting cells

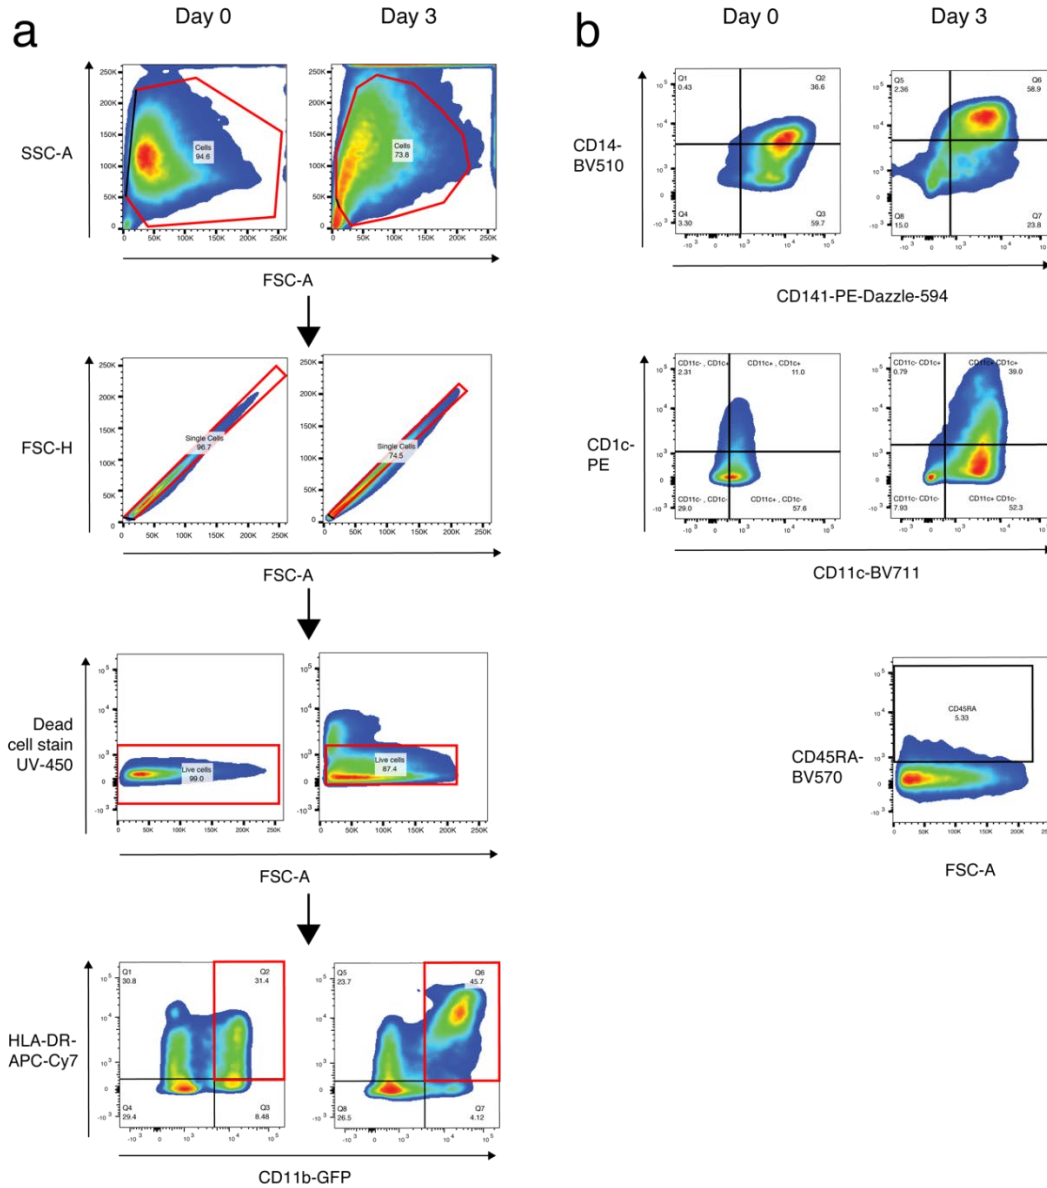

**Supplementary Figure 1. Related to Figures 2 and 3.** Antigen-presenting cells, positive for CD11b<sup>+</sup> HLA-DR<sup>+</sup> CD14<sup>+</sup> CD141<sup>+</sup> and negative for plasmacytoid dendritic cell marker CD45RA, were enriched from fresh human bone marrow mononuclear cells with cytokines GM-CSF, IL4 and PGE2. **A)** Gating strategy of enriched monocytes after overnight incubation at Day 0 and at Day 3 in non-adherent culture with GM-CSF, IL4, and PGE2. Applies to Fig. 2a-b, Fig. 3a-f, and h, Fig. 4f-g **B)** Plots were gated on CD11b<sup>+</sup> HLA-DR<sup>+</sup> cells and analyzed for CD14, CD141, CD11c, CD1c, and CD45RA at Day 0 and Day 3.

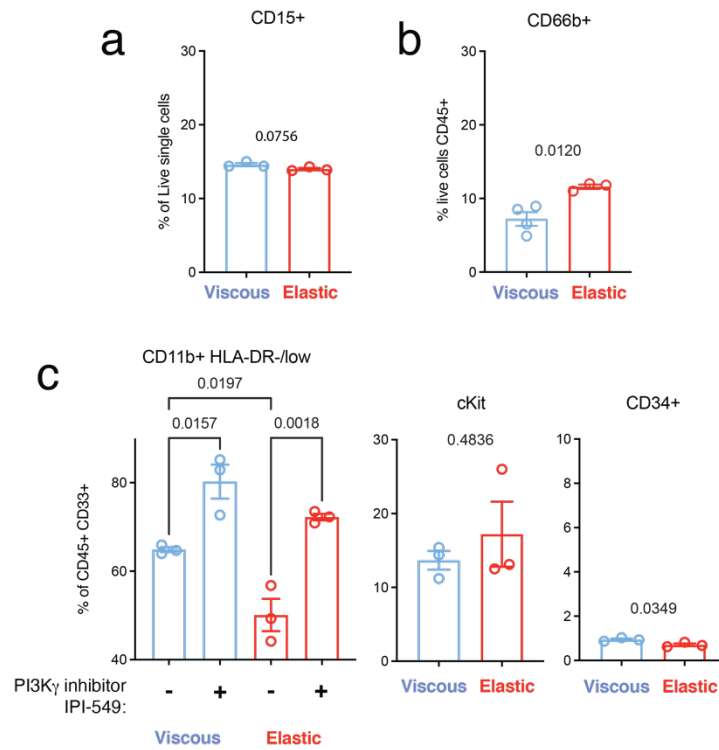

**Supplementary Figure 2. Related to Figure 3.** Flow cytometry of immature myeloid markers in viscous and elastic matrices. **A-B)** Fraction of cells expressing neutrophil markers CD15 (**A**) and CD66b (**B**), gated on live and live CD45+ cells, respectively. HLA-DR and CD11b with quantification of HLA-DR mean fluorescence intensity (MFI) on the right, gated on live cells. P-values < 0.05 indicate statistically significant difference by unpaired two-tailed Student's t test, n=3 biological replicates from a single donor. **C)** Fraction of cells expressing immature markers CD11b+ HLA-DR-/low, and stem/progenitor markers c-Kit and CD34, gated on live CD45+CD33+ cells. Cells were treated with 10  $\mu$ M IPI-549 in the left panel of (**C**). Data points indicate n=3 biological replicates from a single donor. P-values < 0.05 indicate statistically significant differences of unpaired two-tailed Student's t test or one-way ANOVA with Tukey's multiple comparisons test. Analyses in gels were performed after 3 days. Data are presented as mean values  $\pm$  SEM.

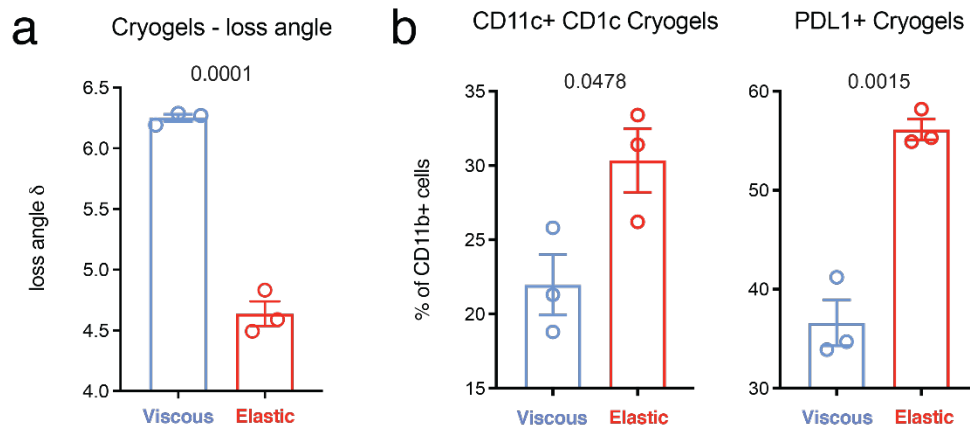

**Supplementary Figure 3.** Monocytes respond to viscoelasticity of macroporous elastic matrix. **A)** Loss-angle ( $\delta$ ) of viscous (blue) or elastic (red) macroporous hydrogels measured by oscillatory shear rheology with a 8 mm flat plate geometry under 10% pre-strain compression at 0.1% strain and 1 Hz. **B)** Fraction of CD11c+ CD1c+ conventional dendritic cells and PDL1+ cells, gated on live CD11b+ cells. P-values <0.05 indicate statistically significant differences of unpaired two-tailed Student's t test with n=3 replicates. Analyses of monocytes in gels were performed after 3 days. Data are presented as mean values +/- SEM.

2.5 wt% collagen-alginate hydrogels

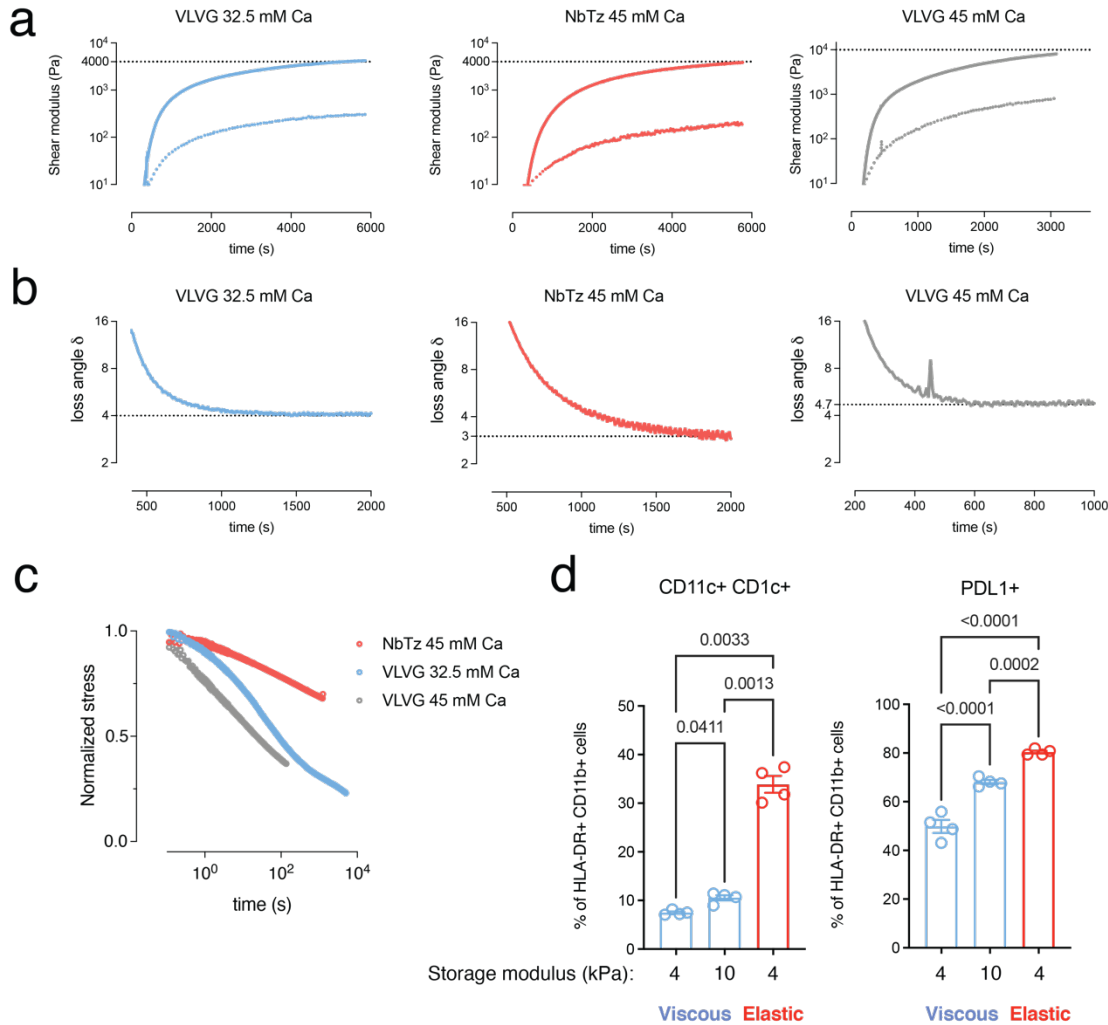

**Supplementary Figure 4.** Increased range of stiffness of viscous hydrogels shows similar effects on monocyte fate as softer viscous material. **A-B)** Rheology timesweeps of storage modulus (**A**) and loss-angle ( $\delta$ ) (**B**) of 4kPa viscous (blue) or elastic (red) and 10 kPa viscous (grey) nanoporous 2.5 wt% collagen-alginate hydrogels measured by oscillatory shear rheology at 1% strain and 1 Hz. **C)** Normalized shear stress relaxation at 15% strain of 2.5 wt% 4 kPa viscous (blue) or elastic (red) and 10 kPa viscous (grey) hydrogels. **D)** Fraction of CD11c+ CD1c+ conventional dendritic cells and PDL1+ cells, gated on live HLA-DR+ CD11b+ cells. P-values <0.05 indicate statistically significant differences of Brown-Forsythe multiple comparisons test (CD11c+ CD1c+) or one-way ANOVA with Tukey's multiple comparisons test (PDL1+) with n=4 biological replicates from 1 donor. Analyses of monocytes in gels were performed after 5 days. Data are presented as mean values +/- SEM.

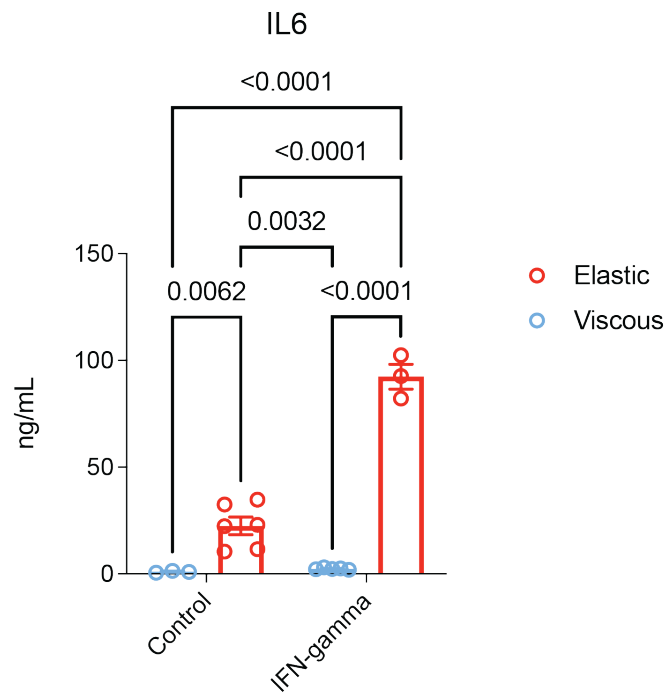

**Supplementary Figure 5.** IL6 is upregulated in elastic hydrogels with IFN-gamma stimulation (100 ng/mL) after 24 hours in culture. Data points indicate biological replicates from n=1 donor. P-values <math><0.05</math> indicate statistically significant differences of two-way ANOVA with Tukey's multiple comparisons test. Data are presented as mean values  $\pm$  SEM.

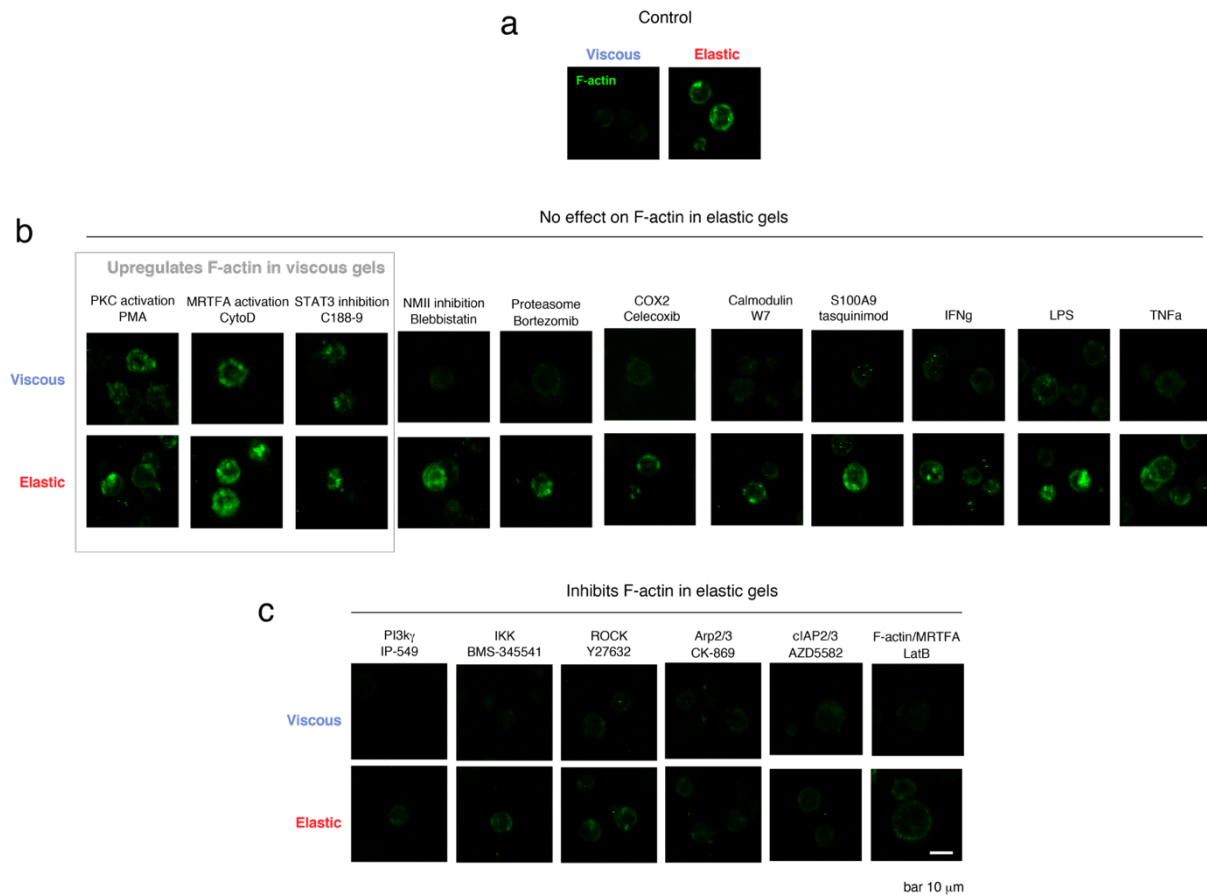

**Supplementary Figure 6. Related to Figure 4.** Chemical and biochemical perturbation alters F-actin cytoskeleton of monocytes in viscous and elastic hydrogels. Cells were treated with panel of cytokines and inhibitors listed in Table S3. F-actin staining (green) of monocytes in viscous and elastic hydrogels (7.5 kPa elastic modulus). Images are maximum intensity projections of representative cells. Scale bar 10  $\mu$ m. All analyses were performed at 3 days after encapsulation. **A)** Control cells with no cytokines or inhibitors in elastic and viscous gels. The treatment conditions are grouped by part **(B)**, demonstrating inhibitors and cytokines that either had no effect on F-actin in elastic gels, or upregulated F-actin in viscous gels (PMA, CytoD, and C188-9), and part **(C)**, demonstrating agents inhibiting F-actin assembly in elastic gels.



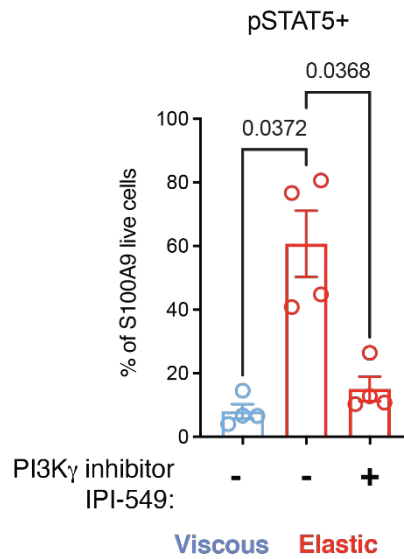

**Supplementary Figure 7. Related to Figure 4.** Flow cytometry of fraction of pSTAT5 positive cells in viscous or elastic gels, gated on live S100A9 cells. Cells were treated with 10  $\mu$ M IPI-549 as indicated (+). Data points indicate n=4 biological replicates from 1 donor. P-values <0.05 indicate statistically significant differences of one-way Brown-Forsythe and Welch ANOVA with multiple comparisons test. Analyses in gels were performed after 3 days. Data are presented as mean values +/- SEM.

**A**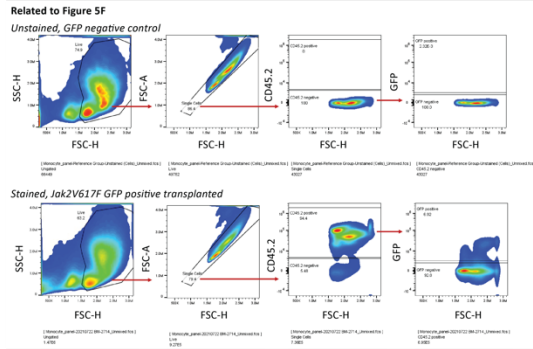**C**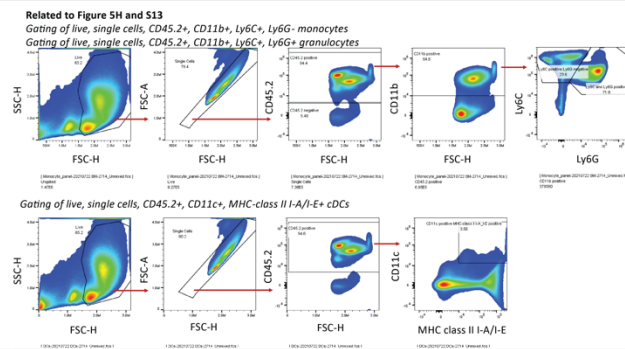**B**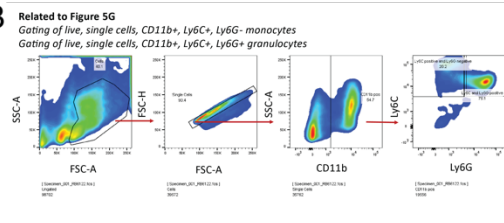

**Supplementary Figure 8. Related to Figure 5.** Gating strategy of flow cytometry analysis of in vivo experiments. **A)** Gating of Jak2V617F GFP+ cells in Figure 5F. **B)** Gating of Ly6C+ Ly6G- monocytes and Ly6C+Ly6G+ granulocytes in Figure 5G. **C)** Gating of CD45.2+ Ly6G- monocytes and Ly6C+Ly6G+ granulocytes (top) and cDCs (bottom) in Figure 5H and Supplementary Figure 13.

**Supplementary Table 1.** Formulations of artificial ECM hydrogels.

| <b>Hydrogel</b>          | <b>Collagen<br/>(mg/mL)</b> | <b>Total<br/>alginate<br/>(%<br/>w/v)</b> | <b>VLVG<br/>alginate<br/>(%<br/>w/v)</b> | <b>Nb-<br/>alginate<br/>(%<br/>w/v)</b> | <b>Tz-<br/>alginate<br/>(%<br/>w/v)</b> | <b>CaCO<sub>3</sub><br/>(%<br/>w/v)</b> | <b>GDL<br/>(mM)</b> | <b>Nb:Tz<br/>ratio</b> | <b>Elastic<br/>modulus*<br/>(kPa)<br/><del>(12)</del></b> |
|--------------------------|-----------------------------|-------------------------------------------|------------------------------------------|-----------------------------------------|-----------------------------------------|-----------------------------------------|---------------------|------------------------|-----------------------------------------------------------|
| <b>Soft<br/>viscous</b>  | 4                           | 1.5                                       | 1.5                                      | 0                                       | 0                                       | 0.10                                    | 40                  | n/a                    | 0.75                                                      |
| <b>Stiff<br/>viscous</b> | 4                           | 1.5                                       | 1.5                                      | 0                                       | 0                                       | 0.30                                    | 120                 | n/a                    | 7.5                                                       |
| <b>Soft<br/>elastic</b>  | 4                           | 1.5                                       | 0.5                                      | 0.2                                     | 0.8                                     | 0.10                                    | 40                  | 0.25                   | 0.75                                                      |
| <b>Stiff<br/>elastic</b> | 4                           | 1.5                                       | 0                                        | 0.75                                    | 0.75                                    | 0.30                                    | 120                 | 1.0                    | 7.5                                                       |

\* Effective elastic modulus =  $2G'(1 + \nu)$ ;  $G'$ , storage modulus;  $\nu=0.5$ .

**Supplementary Table 2.** Human bone marrow donors.

| <b>Data</b>                                          | <b>Donor</b> | <b>Lot</b> | <b>Age</b> | <b>Gender</b> | <b>Race</b> |
|------------------------------------------------------|--------------|------------|------------|---------------|-------------|
| <b>Fig. 2A</b>                                       | Donor 8      | 0000847823 | 30         | Female        | AA          |
| <b>Fig. 2B</b>                                       | Donor 2      | 0000760557 | 21         | Male          | AA          |
| <b>Fig. 2C</b>                                       | Donor 1      | 0000732183 | 22         | Male          | AA          |
| <b>Fig. 2D-F</b>                                     | Donor 1      | 0000732183 | 22         | Male          | AA          |
|                                                      | Donor 2      | 0000760557 | 21         | Male          | AA          |
| <b>Fig. 3A-E</b>                                     | Donor 3      | 0000770348 | 24         | Female        | AA          |
| <b>Fig. 3F –<br/>CD68+ and<br/>CD11c+<br/>CD163+</b> | Donor 8      | 0000847823 | 30         | Female        | AA          |
| <b>Fig. 3F –<br/>SLAMF7</b>                          | Donor 9      | 0000932523 | 27         | Male          | AA          |
| <b>Fig. 3G</b>                                       | Donor 5      | 0000805152 | 24         | Male          | AA          |
| <b>Fig. 3H</b>                                       | Donor 9      | 0000932523 | 27         | Male          | AA          |
| <b>Fig. 3I</b>                                       | Donor 2      | 0000760557 | 21         | Male          | AA          |
|                                                      | Donor 3      | 0000770348 | 24         | Female        | AA          |
| <b>Fig. 4A</b>                                       | Donor 2      | 0000760557 | 21         | Male          | AA          |
|                                                      | Donor 3      | 0000770348 | 24         | Female        | AA          |
| <b>Fig. 4B-C<br/>images</b>                          | Donor 4      | 0000789470 | 22         | Male          | AA          |
| <b>Fig. 4C<br/>scatterplot</b>                       | Donor 7      | 0000817985 | 27         | Male          | O           |
| <b>Fig. 4D</b>                                       | Donor 7      | 0000817985 | 27         | Male          | O           |
| <b>Fig. 4E</b>                                       | Donor 5      | 0000805152 | 24         | Male          | AA          |
| <b>Fig. 4F</b>                                       | Donor 5      | 0000805152 | 24         | Male          | AA          |
| <b>Fig. 4G</b>                                       | Donor 12     | 0000978383 | 31         | Female        | AA          |
| <b>Fig. 5B</b>                                       | Donor 6      | 0000814631 | 30         | Male          | O           |
|                                                      | Donor 7      | 0000817985 | 27         | Male          | O           |
| <b>Extended Data<br/>Fig. 1</b>                      | Donor 1      | 0000732183 | 22         | Male          | AA          |
|                                                      | Donor 2      | 0000760557 | 21         | Male          | AA          |
| <b>Extended Data<br/>Fig. 2</b>                      | Donor 1      | 0000732183 | 22         | Male          | AA          |
|                                                      | Donor 2      | 0000760557 | 21         | Male          | AA          |
|                                                      | Donor 3      | 0000770348 | 24         | Female        | AA          |
| <b>Extended Data<br/>Fig. 3A-B</b>                   | Donor 10     | 0000643483 | 25         | Male          | H           |
| <b>Extended Data<br/>Fig. 3C</b>                     | Donor 7      | 0000817985 | 27         | Male          | O           |

---

|                              |          |            |    |        |    |
|------------------------------|----------|------------|----|--------|----|
| <b>Extended Data Fig. 3D</b> | Donor 1  | 0000732183 | 22 | Male   | AA |
|                              | Donor 2  | 0000760557 | 21 | Male   | AA |
| <b>Extended Data Fig. 4A</b> | Donor 11 | 0000920289 | 28 | Male   | AA |
| <b>Extended Data Fig. 4B</b> | Donor 2  | 0000760557 | 21 | Male   | AA |
| <b>Extended Data Fig. 4C</b> | Donor 4  | 0000789470 | 22 | Male   | AA |
| <b>Extended Data Fig. 4D</b> | Donor 3  | 0000770348 | 24 | Female | AA |
| <b>Suppl. Fig. 1</b>         | Donor 1  | 0000732183 | 22 | Male   | AA |
| <b>Suppl. Fig. 2A</b>        | Donor 6  | 0000814631 | 30 | Male   | O  |
| <b>Suppl. Fig. 2B</b>        | Donor 14 | 0001038389 | 24 | Male   | AA |
| <b>Suppl. Fig. 2C</b>        | Donor 13 | 0001011086 | 33 | Male   | C  |
| <b>Suppl. Fig. 3-4</b>       | Donor 14 | 0001020534 | 22 | Female | O  |
| <b>Suppl. Fig. 5</b>         | Donor 4  | 0000789470 | 22 | Male   | AA |
| <b>Suppl. Fig. 6</b>         | Donor 4  | 0000789470 | 22 | Male   | AA |
| <b>Suppl. Fig. 7</b>         | Donor 14 | 0001020534 | 22 | Female | O  |

---

**Supplementary Table 3.** Pharmacological inhibitors and cytokine treatments.

| <b>Name</b>           | <b>Synonyms</b> | <b>Catalog #</b> | <b>Target</b>                 | <b>Concentration</b> | <b>Stock</b> | <b>Manufacturer</b> |
|-----------------------|-----------------|------------------|-------------------------------|----------------------|--------------|---------------------|
| <b>tasquinimod</b>    | ABR-215050      | S7617            | S100A9 binding to TLR4        | 50 uM                | 50 mM        | Selleckchem         |
| <b>IKK inhibitor</b>  | BMS-345541      |                  | IKK                           | 5 uM                 | 50 mM        |                     |
| <b>blebbistatin</b>   |                 |                  | NMII                          | 10 uM                | 50 mM        |                     |
| <b>ROCK inhibitor</b> | Y-27632         |                  | ROCK                          | 10 uM                | 10 mM        |                     |
| <b>Bortezomib</b>     | PS-341          | S1013            | Proteasome                    | 10 nM                | 10 mM        | Selleckchem         |
| <b>Cytochalasin D</b> | CytoD           | C8273            | F actin depolymerization      | 5 uM                 | 5 mM         |                     |
| <b>Latrunculin B</b>  | LatB            | 39741            | F actin stabilization         | 1.0 uM               | 10 mM        | Tocris              |
| <b>IP-549</b>         | IP549           | S8330            | PI3K-gamma inhibitor          | 1 uM                 | 10 mM        | Selleckchem         |
| <b>C188-9</b>         | C188-9          | S8605            | STAT3 inhibitor               | 30 uM                | 50 mM        | Selleckchem         |
| <b>PMA</b>            | PMA             | P1585            | PKC activator; blocks F-actin | 162 nM               | 10 mM        | Sigma               |
| <b>LPS</b>            | LPS             | L4391            | TLR4 agonist                  | 1 ug/mL              | 1 ug/uL      | Sigma               |
| <b>IFN-gamma</b>      | IFN-gamma       |                  | activates TNFalpha/TGFbeta    | 100 ng/mL            | 20 ng/uL     |                     |
| <b>CK-869</b>         | CK-869          | 4984             | Arp2/3                        | 100 uM               | 100 mM       | Tocris              |
| <b>AZD5582</b>        | AZD5582         | S7362            | cIAP1/2                       | 5 uM                 | 5 mM         | Selleckchem         |
| <b>W7</b>             | sc-201501       | sc-201501        | Calmodulin                    | 20 uM                | 50 mM        | Scbt                |
| <b>Celecoxib</b>      | 3786            | 3786             | COX2                          | 10 uM                | 10 mM        | R&D                 |
| <b>TNFa</b>           | TNFa            |                  | TNF receptor                  | 100 U/mL             | 10 U/uL      |                     |

**Supplementary Table 4.** Clinical trials investigating IPI-549.

| <b>NCT number</b>  | <b>Conditions</b>                                                                                                                                                                                                                              | <b>Interventions</b>                                                                   |
|--------------------|------------------------------------------------------------------------------------------------------------------------------------------------------------------------------------------------------------------------------------------------|----------------------------------------------------------------------------------------|
| <b>NCT03795610</b> | Head and Neck Squamous Cell Carcinoma (HPV+ and HPV-)                                                                                                                                                                                          | IPI-549                                                                                |
| <b>NCT03980041</b> | Bladder Cancer<br>Urothelial Carcinoma<br>Solid Tumor<br>Advanced Cancer                                                                                                                                                                       | IPI-549, Nivolumab, Placebos                                                           |
| <b>NCT02637531</b> | Advanced Solid Tumors<br>Non-small Cell Lung Cancer<br>Melanoma<br>Squamous Cell Cancer of the Head and Neck<br>Triple Negative Breast Cancer<br>Adrenocortical Carcinoma<br>Mesothelioma<br>High-circulating Myeloid-derived Suppressor Cells | IPI-549, Nivolumab                                                                     |
| <b>NCT03961698</b> | Breast Cancer<br>Renal Cell Carcinoma                                                                                                                                                                                                          | IPI-549, Atezolizumab, nab-paclitaxel, Bevacizumab                                     |
| <b>NCT03719326</b> | TNBC - Triple-Negative Breast Cancer<br>Ovarian Cancer                                                                                                                                                                                         | AB928, IPI-549, Pegylated liposomal doxorubicin, nanoparticle albumin-bound paclitaxel |

**Supplementary Table 5.** Significant pathways enriched by elasticity in Jak2-V617F monocytes.

| <b>Pathway</b>                                       | <b>P value</b> | <b>Q value</b> |
|------------------------------------------------------|----------------|----------------|
| mmu00100 Steroid biosynthesis                        | 0.000126502    | 0.020366871    |
| mmu04810 Regulation of actin cytoskeleton            | 0.000826272    | 0.066514923    |
| mmu04141 Protein processing in endoplasmic reticulum | 0.003405617    | 0.175071627    |
| mmu04144 Endocytosis                                 | 0.004349606    | 0.175071627    |
| mmu04350 TGF-beta signaling pathway                  | 0.006905444    | 0.201043481    |
| mmu00900 Terpenoid backbone biosynthesis             | 0.008082702    | 0.201043481    |
| mmu04510 Focal adhesion                              | 0.009049598    | 0.201043481    |
| mmu04630 Jak-STAT signaling pathway                  | 0.009989738    | 0.201043481    |
| mmu04010 MAPK signaling pathway                      | 0.011301186    | 0.202165669    |
| mmu04530 Tight junction                              | 0.014782141    | 0.237992472    |
| mmu04740 Olfactory transduction                      | 0.022715283    | 0.332469148    |
| mmu04620 Toll-like receptor signaling pathway        | 0.027775156    | 0.340707778    |
| mmu04910 Insulin signaling pathway                   | 0.028762721    | 0.340707778    |
| mmu04062 Chemokine signaling pathway                 | 0.03117042     | 0.340707778    |
| mmu04012 ErbB signaling pathway                      | 0.032897885    | 0.340707778    |
| mmu04320 Dorso-ventral axis formation                | 0.033859158    | 0.340707778    |
| mmu04340 Hedgehog signaling pathway                  | 0.036987263    | 0.350291142    |
| mmu04662 B cell receptor signaling pathway           | 0.039181195    | 0.350454022    |
| mmu04621 NOD-like receptor signaling pathway         | 0.042585999    | 0.351282978    |
| mmu04360 Axon guidance                               | 0.043637637    | 0.351282978    |
| mmu04670 Leukocyte transendothelial migration        | 0.046269776    | 0.35473495     |
| mmu04920 Adipocytokine signaling pathway             | 0.070865494    | 0.518606566    |
| mmu04976 Bile secretion                              | 0.074100007    | 0.518700052    |
| mmu04660 T cell receptor signaling pathway           | 0.084909062    | 0.53317689     |
| mmu04330 Notch signaling pathway                     | 0.084928011    | 0.53317689     |
| mmu04722 Neurotrophin signaling pathway              | 0.0861031      | 0.53317689     |
| mmu04380 Osteoclast differentiation                  | 0.091937857    | 0.548222037    |
|                                                      |                |                |
|                                                      |                |                |



**Supplementary Table 6.** Significant pathways enriched in viscous hydrogels in Jak2-V617F monocytes.

| <b>Pathway</b>                                  | <b>P value</b> | <b>Q value</b> |
|-------------------------------------------------|----------------|----------------|
| mmu03010 Ribosome                               | 2.50E-08       | 4.02E-06       |
| mmu00190 Oxidative phosphorylation              | 0.0031133      | 0.250620672    |
| mmu00760 Nicotinate and nicotinamide metabolism | 0.007212543    | 0.329530722    |
| mmu04142 Lysosome                               | 0.008187099    | 0.329530722    |
| mmu00240 Pyrimidine metabolism                  | 0.018524637    | 0.596493306    |
|                                                 |                |                |

**Supplementary Table 7.** Genes enriched in elastic hydrogels in Jak2-V617F monocytes.

| <b>Gene symbol</b> | <b>PANTHER molecular function</b>           | <b>Category</b>                                            | <b>Log2 Fold change vs viscous gels</b> | <b>Adj P value</b> |
|--------------------|---------------------------------------------|------------------------------------------------------------|-----------------------------------------|--------------------|
| Ereg               | Proepiregulin                               | Growth factor                                              | 3.835940598                             | 0.015499305        |
| Arhgef3            | Rho guanine nucleotide exchange factor 3    | Rho pathway                                                | 0.731307872                             | 0.016998345        |
| Areg               | Amphiregulin                                | Growth factor                                              | 3.408225655                             | 0.029073796        |
| Acvr11             | Serine/threonine-protein kinase receptor R3 | TGF-beta recetpor serine/threonine protein kinase receptor | 1.058920167                             | 0.032084746        |
| Dpysl2             | Dihydropyrimidinase-related protein 2       | metalloprotease                                            | 0.702704318                             | 0.038874481        |
| Rhob               | Rho-related GTP-binding protein RhoB        | Rho pathway                                                | 1.259725058                             | 0.069730211        |
|                    |                                             |                                                            |                                         |                    |

**Supplementary Table 8.** Genes enriched in viscous hydrogels in Jak2-V617F monocytes.

| <b>Gene symbol</b> | <b>PANTHER molecular function</b>                           | <b>Category</b>      | <b>Log2 Fold change vs elastic gels</b> | <b>Adj P value</b> |
|--------------------|-------------------------------------------------------------|----------------------|-----------------------------------------|--------------------|
| H2-Eb1             | H-2 class II histocompatibility antigen, E-B beta chain     | MHC II               | 1.407799702                             | 6.11E-05           |
| Ciita              | MHC class II transactivator                                 |                      | 1.435016594                             | 0.000383511        |
| Lilrb4a            | Leukocyte immunoglobulin-like receptor subfamily B member 4 |                      | 1.098861559                             | 0.00394989         |
| H2-Aa              | H-2 class II histocompatibility antigen, A-K alpha chain    | MHC II               | 1.272826974                             | 0.025815262        |
| Mx1                | Interferon-induced GTP-binding protein Mx1                  | Interferon signaling | 0.862592772                             | 0.029073796        |
| Ccnd1              | G1/S-specific cyclin-D1                                     | Cell cycle           | 2.15214005                              | 0.055162012        |
|                    |                                                             |                      |                                         |                    |

**Supplementary Table 9.** Statistical tests in data of main figures.

| <b>Data</b>                 | <b>Test</b>                                            | <b>Passed Normality test?</b> | <b>Variances significantly different (p &lt; 0.05)?</b> | <b>Data analyzed</b>               | <b>P-value*</b>   |
|-----------------------------|--------------------------------------------------------|-------------------------------|---------------------------------------------------------|------------------------------------|-------------------|
| <b>Fig. 1F</b>              | Unpaired t test, Welch correction, two-tailed          | Yes                           | Yes                                                     | Alg – 5, NbTz - 6                  | <b>0.0227</b>     |
| <b>Fig. 1G - modulus</b>    | Unpaired t test, two-tailed                            | Yes                           | No                                                      | Alg – 5, NbTz - 12                 | 0.3720            |
| <b>Fig. 1G – loss angle</b> | Unpaired t test, two-tailed                            | Yes                           | No                                                      | Alg – 5, NbTz - 12                 | <b>0.0012</b>     |
| <b>Fig. 2A</b>              | Unpaired t test, two-tailed                            | Yes                           | No                                                      | 3 each                             | <b>&lt;0.0001</b> |
| <b>Fig. 3C-F</b>            | Unpaired t test, two-tailed                            | Yes                           | No                                                      | 3 each                             | <b>See chart</b>  |
| <b>Fig. 3G</b>              | Mann Whitney non-parametric test, two-tailed           | No                            | n/a                                                     | Viscous – 89, Elastic - 95         | <b>&lt;0.0001</b> |
| <b>Fig. 3H</b>              | Ordinary one-way ANOVA<br>Tukey's multiple comparisons | Yes                           | No                                                      | 3 each                             |                   |
|                             |                                                        |                               |                                                         | Viscous control vs Viscous C188-9  | 0.9569            |
|                             |                                                        |                               |                                                         | Viscous control vs Elastic control | <b>&lt;0.0001</b> |
|                             |                                                        |                               |                                                         | Viscous control vs Elastic C188-9  | <b>&lt;0.0001</b> |
|                             |                                                        |                               |                                                         | Viscous IPI-549 vs Elastic control | <b>&lt;0.0001</b> |
|                             |                                                        |                               |                                                         | Viscous IPI-549 vs Elastic C188-9  | <b>&lt;0.0001</b> |
|                             |                                                        |                               |                                                         | Elastic control vs Elastic C188-9  | <b>&lt;0.0001</b> |
| <b>Fig. 3I</b>              | Mann Whitney non-parametric test, two-tailed           | No                            | n/a                                                     | Viscous – 57, Elastic - 22         | <b>0.0005</b>     |
| <b>Fig. 4A</b>              | Mann Whitney non-parametric test, two-tailed           | No                            | n/a                                                     | Viscous – 57, Elastic - 43         | <b>&lt;0.0001</b> |
| <b>Fig. 4C</b>              | Mann Whitney non-parametric test, two-tailed           | No                            | n/a                                                     | Viscous – 30, Elastic – 32         | <b>0.0021</b>     |

|                                         |                                                     |                           |                              |                                    |                   |                                    |                   |
|-----------------------------------------|-----------------------------------------------------|---------------------------|------------------------------|------------------------------------|-------------------|------------------------------------|-------------------|
| <b>Fig. 4D</b>                          | Unpaired t test,<br>Welch correction,<br>two-tailed | Yes                       | Yes                          | Viscous – 30,<br>Elastic – 32      | <b>&lt;0.0001</b> |                                    |                   |
| <b>Fig. 4E – % live cells</b>           | Ordinary one-way ANOVA                              | Yes                       | No                           | 6 each                             | 0.9838            |                                    |                   |
| <b>Fig. 4E – relative cell count</b>    | Ordinary one-way ANOVA                              | Yes                       | No                           | 6 each                             | 0.8823            |                                    |                   |
| <b>Fig. 4F – gMFI of HLA-DR-APC-Cy7</b> | Ordinary one-way ANOVA                              | Yes                       | No                           | 3 each                             |                   |                                    |                   |
|                                         | Tukey's multiple comparisons                        |                           |                              | Viscous control vs Viscous IPI-549 | 0.0553            |                                    |                   |
|                                         |                                                     |                           |                              | Viscous control vs Viscous ROCK    | 0.9640            |                                    |                   |
|                                         |                                                     |                           |                              | Viscous IPI-549 vs Viscous ROCK    | 0.1960            |                                    |                   |
|                                         |                                                     |                           |                              | Viscous control vs Elastic control | <b>&lt;0.0001</b> |                                    |                   |
|                                         |                                                     |                           |                              | Viscous control vs Elastic IPI-549 | 0.1521            |                                    |                   |
|                                         |                                                     |                           |                              | Viscous control vs Elastic ROCK    | <b>&lt;0.0001</b> |                                    |                   |
|                                         |                                                     |                           |                              | Viscous IPI-549 vs Elastic control | <b>&lt;0.0001</b> |                                    |                   |
|                                         |                                                     |                           |                              | Viscous IPI-549 vs Elastic IPI-549 | <b>0.0007</b>     |                                    |                   |
|                                         |                                                     |                           |                              | Viscous ROCK vs Elastic ROCK       | <b>&lt;0.0001</b> |                                    |                   |
|                                         |                                                     |                           |                              | Elastic ROCK vs Elastic IPI-549    | <b>0.0053</b>     |                                    |                   |
|                                         |                                                     |                           |                              | Elastic control vs Elastic IPI-549 | <b>&lt;0.0001</b> |                                    |                   |
|                                         |                                                     | <b>Fig. 4F – % CD11c+</b> | Ordinary one-way ANOVA       | Yes                                | No                | 3 each                             |                   |
|                                         |                                                     |                           | Tukey's multiple comparisons |                                    |                   | Viscous control vs Viscous IPI-549 | <b>&lt;0.0001</b> |
|                                         |                                                     |                           |                              | Viscous control vs Viscous ROCK    | 0.7122            |                                    |                   |
|                                         |                                                     |                           |                              | Viscous control vs Elastic control | <b>&lt;0.0001</b> |                                    |                   |
|                                         |                                                     |                           |                              | Viscous control vs Elastic IPI-549 | <b>0.0209</b>     |                                    |                   |
|                                         |                                                     |                           |                              | Viscous control vs Elastic ROCK    | <b>&lt;0.0001</b> |                                    |                   |
|                                         |                                                     |                           |                              | Viscous IPI-549 vs Viscous ROCK    | <b>&lt;0.0001</b> |                                    |                   |
|                                         |                                                     |                           |                              | Viscous IPI-549 vs Elastic control | <b>&lt;0.0001</b> |                                    |                   |

|                                |                                        |     |     |        |                                    |                   |
|--------------------------------|----------------------------------------|-----|-----|--------|------------------------------------|-------------------|
|                                |                                        |     |     |        | Viscous IPI-549 vs Elastic ROCK    | <b>&lt;0.0001</b> |
|                                |                                        |     |     |        | Viscous IPI-549 vs Elastic IPI-549 | <b>&lt;0.0001</b> |
|                                |                                        |     |     |        | Elastic control vs Elastic ROCK    | <b>0.0063</b>     |
|                                |                                        |     |     |        | Elastic control vs Elastic IPI-549 | <b>&lt;0.0001</b> |
|                                |                                        |     |     |        | Elastic ROCK vs Elastic IPI-549    | <b>0.0018</b>     |
| <b>Fig. 4G – % CD11c+CD1c+</b> | Ordinary one-way ANOVA                 | Yes | No  | 4 each |                                    |                   |
|                                | Tukey's multiple comparisons           |     |     |        | Elastic control vs Elastic IPI-549 | <b>&lt;0.0001</b> |
|                                |                                        |     |     |        | Elastic control vs Elastic RN-1734 | <b>&lt;0.0001</b> |
|                                |                                        |     |     |        | Elastic control vs Elastic TGFB1   | 0.9497            |
|                                |                                        |     |     |        | Elastic IPI-549 vs Elastic RN-1734 | <b>0.0117</b>     |
|                                |                                        |     |     |        | Elastic IPI-549 vs Elastic TGFB1   | <b>&lt;0.0001</b> |
|                                |                                        |     |     |        | Elastic RN-1734 vs Elastic TGFB1   | <b>&lt;0.0001</b> |
| <b>Fig. 5B – hIL6</b>          | Brown-Forsythe and Welch ANOVA test    | Yes | Yes | 3 each |                                    |                   |
|                                | Dunnett's T3 multiple comparisons test |     |     |        | Viscous control vs Viscous IPI-549 | 0.5584            |
|                                |                                        |     |     |        | Viscous control vs Elastic control | <b>&lt;0.0001</b> |
|                                |                                        |     |     |        | Viscous control vs Elastic IPI-549 | 0.0860            |
|                                |                                        |     |     |        | Viscous IPI-549 vs Elastic control | <b>0.0004</b>     |
|                                |                                        |     |     |        | Viscous IPI-549 vs Elastic IPI-549 | 0.0778            |
|                                |                                        |     |     |        | Elastic control vs Elastic IPI-549 | <b>0.0173</b>     |
| <b>Fig. 5B – hCCL2</b>         | Brown-Forsythe and Welch ANOVA test    | Yes | Yes | 3 each |                                    |                   |
|                                | Dunnett's T3 multiple comparisons test |     |     |        | Viscous control vs Viscous IPI-549 | n/a               |
|                                |                                        |     |     |        | Viscous control vs Elastic control | <b>0.0010</b>     |

|                        |                                                                               |     |     |                                                                                                                                                                                                                                                                                                                |                                                                                                                     |
|------------------------|-------------------------------------------------------------------------------|-----|-----|----------------------------------------------------------------------------------------------------------------------------------------------------------------------------------------------------------------------------------------------------------------------------------------------------------------|---------------------------------------------------------------------------------------------------------------------|
|                        |                                                                               |     |     | Viscous control vs Elastic IPI-549                                                                                                                                                                                                                                                                             | <b>0.0343</b>                                                                                                       |
|                        |                                                                               |     |     | Viscous IPI-549 vs Elastic control                                                                                                                                                                                                                                                                             | n/a                                                                                                                 |
|                        |                                                                               |     |     | Viscous IPI-549 vs Elastic IPI-549                                                                                                                                                                                                                                                                             | n/a                                                                                                                 |
|                        |                                                                               |     |     | Elastic control vs Elastic IPI-549                                                                                                                                                                                                                                                                             | <b>0.0045</b>                                                                                                       |
| <b>Fig. 5B – hCCL4</b> | Ordinary One-way ANOVA<br><br>Tukey's multiple comparisons test               | Yes | No  | 6 for elastic gels (below limit of detection for some viscous gels, n = 2)<br>Viscous control vs Viscous IPI-549<br>Viscous control vs Elastic control<br>Viscous control vs Elastic IPI-549<br>Viscous IPI-549 vs Elastic control<br>Viscous IPI-549 vs Elastic IPI-549<br>Elastic control vs Elastic IPI-549 | n/a<br>n/a<br>n/a<br>n/a<br>n/a<br>n/a<br><b>&lt;0.0001</b>                                                         |
| <b>Fig. 5B – hIL8</b>  | Brown-Forsythe and Welch ANOVA test<br>Dunnett's T3 multiple comparisons test | Yes | Yes | 3 each<br><br>Viscous control vs Viscous IPI-549<br><br>Viscous control vs Elastic control<br>Viscous control vs Elastic IPI-549<br>Viscous IPI-549 vs Elastic control<br>Viscous IPI-549 vs Elastic IPI-549<br>Elastic control vs Elastic IPI-549                                                             | 0.1382<br><br><b>&lt;0.0001</b><br><b>&lt;0.0001</b><br><b>&lt;0.0001</b><br><b>&lt;0.0001</b><br><b>&lt;0.0001</b> |
| <b>Fig. 5D - WBC</b>   | Unpaired t test, Welch correction, two-tailed                                 | Yes | Yes | EV – 9, Jak2-V617F – 10                                                                                                                                                                                                                                                                                        | <b>0.0253</b>                                                                                                       |
| <b>Fig. 5D - RBC</b>   | Unpaired t test, Welch correction, two-tailed                                 | Yes | Yes | EV – 9, Jak2-V617F – 10                                                                                                                                                                                                                                                                                        | <b>&lt;0.0001</b>                                                                                                   |
| <b>Fig. 5D - HCT</b>   | Unpaired t test, two-tailed                                                   | Yes | No  | EV – 9, Jak2-V617F – 10                                                                                                                                                                                                                                                                                        | <b>0.0079</b>                                                                                                       |

|                              |                                                                                 |     |     |                                                                                 |               |
|------------------------------|---------------------------------------------------------------------------------|-----|-----|---------------------------------------------------------------------------------|---------------|
| <b>Fig. 5D - Spleen</b>      | Unpaired t test,<br>Welch correction,<br>two-tailed                             | Yes | Yes | EV – 9,<br>Jak2-V617F – 9                                                       | <b>0.0024</b> |
| <b>Fig. 5D - Neutrophils</b> | Unpaired t test,<br>Welch correction,<br>two-tailed                             | Yes | Yes | EV – 9,<br>Jak2-V617F – 9                                                       | <b>0.0024</b> |
| <b>Fig. 5E – G'</b>          | Brown-Forsythe<br>and Welch<br>ANOVA<br>Dunnett's T3<br>multiple<br>comparisons | Yes | Yes | WT – 9, BM – 8,<br>Jak2-V617F – 9                                               |               |
|                              |                                                                                 |     |     | WT vs BM                                                                        | 0.1945        |
|                              |                                                                                 |     |     | WT vs Jak2                                                                      | <b>0.0003</b> |
|                              |                                                                                 |     |     | BM vs Jak2                                                                      | <b>0.0011</b> |
| <b>Fig. 5E – tan(delta)</b>  | Ordinary one-way<br>ANOVA<br>Tukey's multiple<br>comparisons                    | Yes | No  | WT – 9, BM – 8,<br>Jak2-V617F – 9                                               |               |
|                              |                                                                                 |     |     | WT vs BM                                                                        | 0.8069        |
|                              |                                                                                 |     |     | WT vs Jak2                                                                      | 0.1193        |
|                              |                                                                                 |     |     | BM vs Jak2                                                                      | 0.3690        |
| <b>Fig. 5F – CD11b+</b>      | Ordinary one-way<br>ANOVA<br>Tukey's multiple<br>comparisons                    | Yes | No  | Control– 7, Non-<br>fibrotic Jak2-<br>V617F – 7,<br>Fibrotic Jak2-<br>V617F – 5 |               |
|                              |                                                                                 |     |     | Control vs Non-<br>fibrotic                                                     | 0.9784        |
|                              |                                                                                 |     |     | Control vs Fibrotic                                                             | 0.9680        |
|                              |                                                                                 |     |     | Non-fibrotic vs<br>Fibrotic                                                     | 0.9122        |
| <b>Fig. 5F – Ly6C+Ly6G-</b>  | Ordinary one-way<br>ANOVA<br>Tukey's multiple<br>comparisons                    | Yes | No  | Control– 7, Non-<br>fibrotic Jak2-<br>V617F – 7,<br>Fibrotic Jak2-<br>V617F – 5 |               |
|                              |                                                                                 |     |     | Control vs Non-<br>fibrotic                                                     | 0.9997        |
|                              |                                                                                 |     |     | Control vs Fibrotic                                                             | <b>0.0010</b> |
|                              |                                                                                 |     |     | Non-fibrotic vs<br>Fibrotic                                                     | <b>0.0020</b> |
| <b>Fig. 5G – Ly6C+Ly6G-</b>  | Unpaired t test,<br>two-tailed                                                  | Yes | No  | Vehicle – 4, IPI-<br>549 – 6                                                    | <b>0.0484</b> |
| <b>Fig. 5G – cDCs</b>        | Unpaired t test,<br>two-tailed                                                  | Yes | No  | Vehicle – 4, IPI-<br>549 – 6                                                    | <b>0.0301</b> |



---

**Fig. 6**

See Methods on  
scRNA-seq  
analysis for  
statistical test  
information

---

\*Bold P-value indicates statistically significant difference,  $p < 0.05$ .

## Supplemental References

- 1 Love, M. I., Huber, W. & Anders, S. Moderated estimation of fold change and dispersion for RNA-seq data with DESeq2. *Genome Biology* **15**, 550, doi:10.1186/s13059-014-0550-8 (2014).
- 2 pheatmap: Pretty Heatmaps v. R package version 1.0.12 (2019).
- 3 Keenan, A. B. *et al.* ChEA3: transcription factor enrichment analysis by orthogonal omics integration. *Nucleic Acids Research* **47**, W212-W224, doi:10.1093/nar/gkz446 (2019).
- 4 Qazi, T. H., Mooney, D. J., Duda, G. N. & Geissler, S. Biomaterials that promote cell-cell interactions enhance the paracrine function of MSCs. *Biomaterials* **140**, 103-114, doi:<https://doi.org/10.1016/j.biomaterials.2017.06.019> (2017).
